# Supplementary material
Source: Springer Nature journal article supplement (https://www.springermedizin.de/resource/supplementary/12884_2013_850_MOESM2_ESM.pdf/9458364)
Supplement: MOESM2 [file 9458364]

Concepts

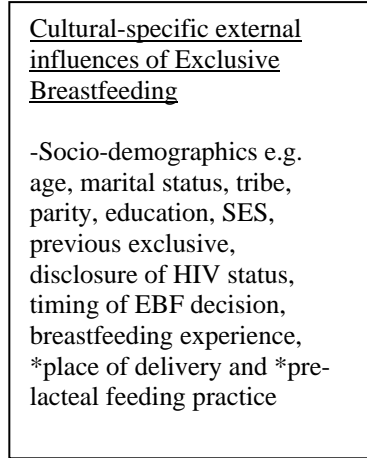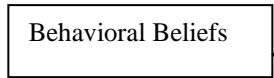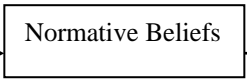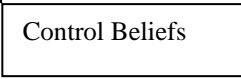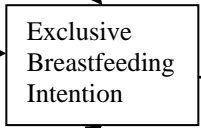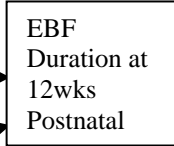

Instruments

Socio-demographic questionnaire (1 item for each datum except SES that was a 7-item scale), and \*1 item each at 12-week follow-up

BAPT scales:  
NEBB & PEBB (Behavioral beliefs)  
NorB (Normative beliefs)  
EBCB (Control beliefs)

2 questions regarding intentions at baseline

2 questions regarding exclusive breastfeeding at 12-week postnatal follow-up
